# Supplementary material
Source: ML conference proceedings conference paper supplement (https://openaccess.thecvf.com/content/ICCV2023/html/Miao_Spectrum-guided_Multi-granularity_Referring_ICCV_2023_paper.html)
Supplement: Supplementary file 2 [file Miao_Spectrum-guided_Multi-granularity_Referring_ICCV_2023_supplemental.zip]

Archive with 2 entries (2 files):
- SgMg-Demo.mp4
- SgMg-Suppl.pdf
